# Supplementary material for: Soluble N-cadherin: A novel inhibitor of VSMC proliferation and intimal thickening
Source: PubMed Central journal article supplement (PMC4749540; doi:10.1016/j.vph.2015.11.040), 2016-03
Supplement: mmc1.pdf [file mmc1.pdf]

# Supplementary Figure 1:

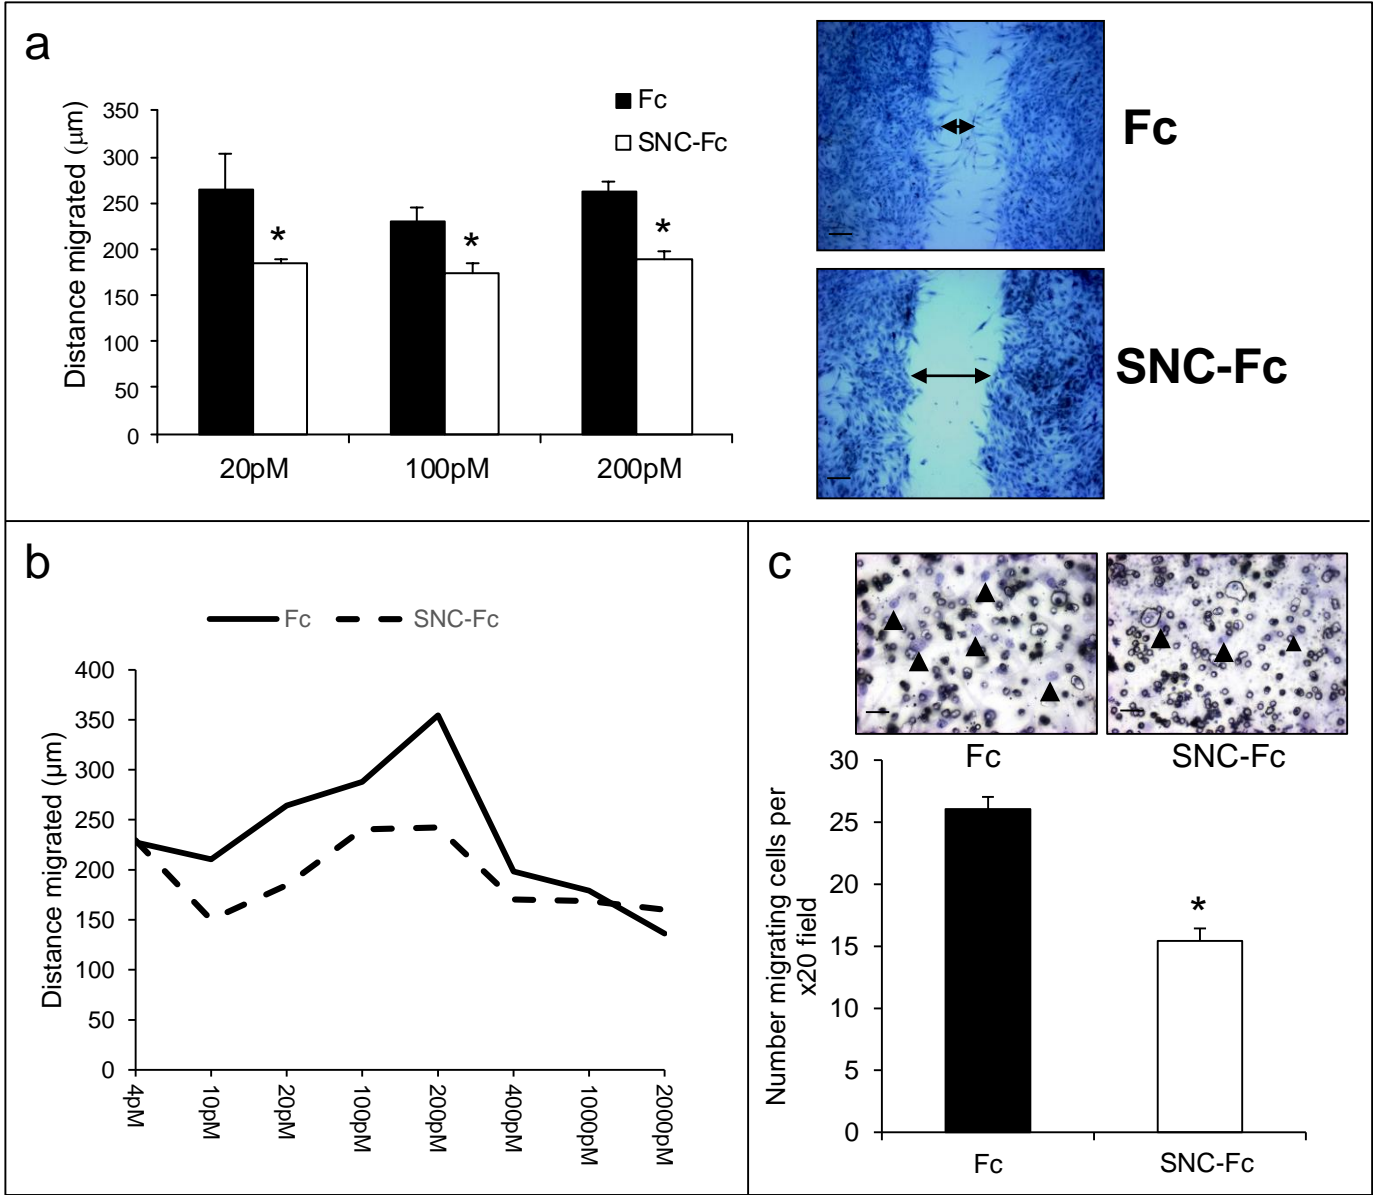

Supplementary Fig 1: SNC modestly reduced VSMC migration.

a: Migration: quantification of distance migrated by human VSMCs in the wounding assay 18 hours after treatment with 20, 100 or 200pM Fc or SNC-Fc in the presence of bFGF and PDGF. \* indicates a significant difference from the Fc control,  $p < 0.05$ ,  $n = 4$ . Representative images of the wounding assay. Arrows indicate wound edges. Scale bar represents  $100\mu\text{m}$ .

c: Quantification of the distance migrated by human VSMCs in the wounding assay 18 hours after treatment with 4 - 2000pM Fc or SNC-Fc, in the presence of bFGF and PDGF,  $n = 1$ .

d: Migration: quantification of the number of migrating cells / field in the Transwell assay after treatment with 200pM Fc or SNC-Fc, in the presence of bFGF and PDGF. \* indicates a significant difference from the Fc control,  $n = 4$ . Representative images of tranwells, arrowheads indicate migrated cells. Scale bars represent  $10\mu\text{m}$ .

# Supplementary Figure 2:

## a: Qiagen siRNA primers

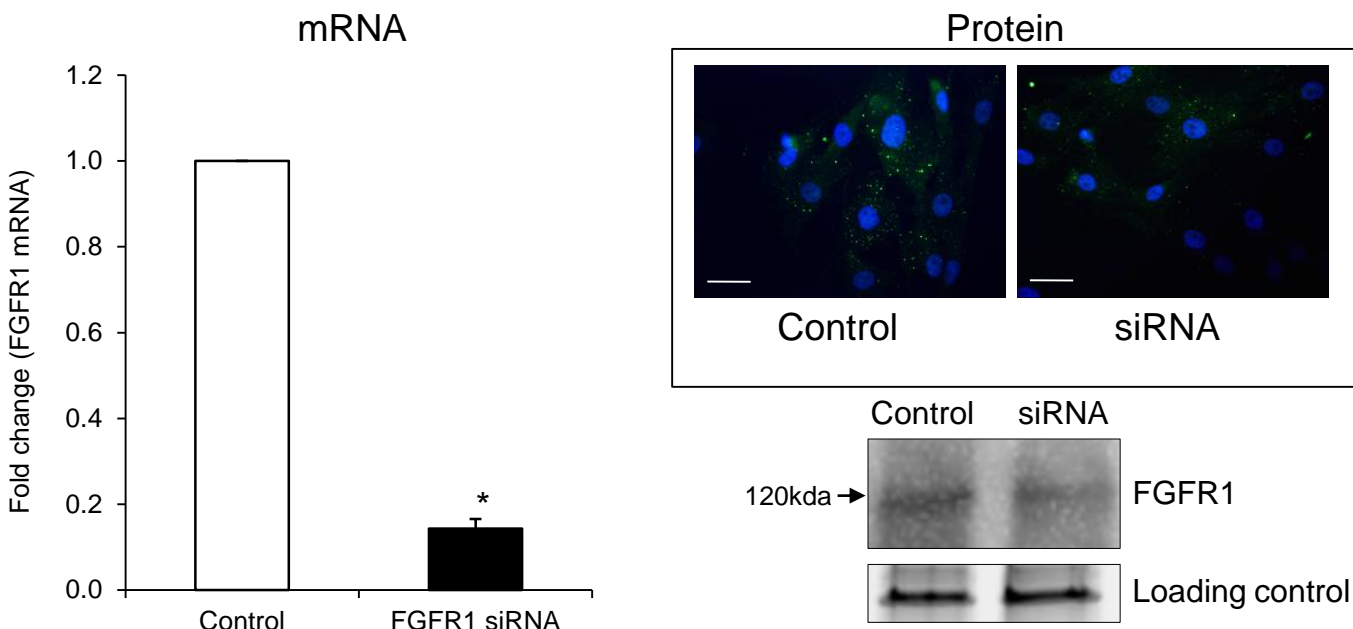

## b: Santa Cruz siRNA primers

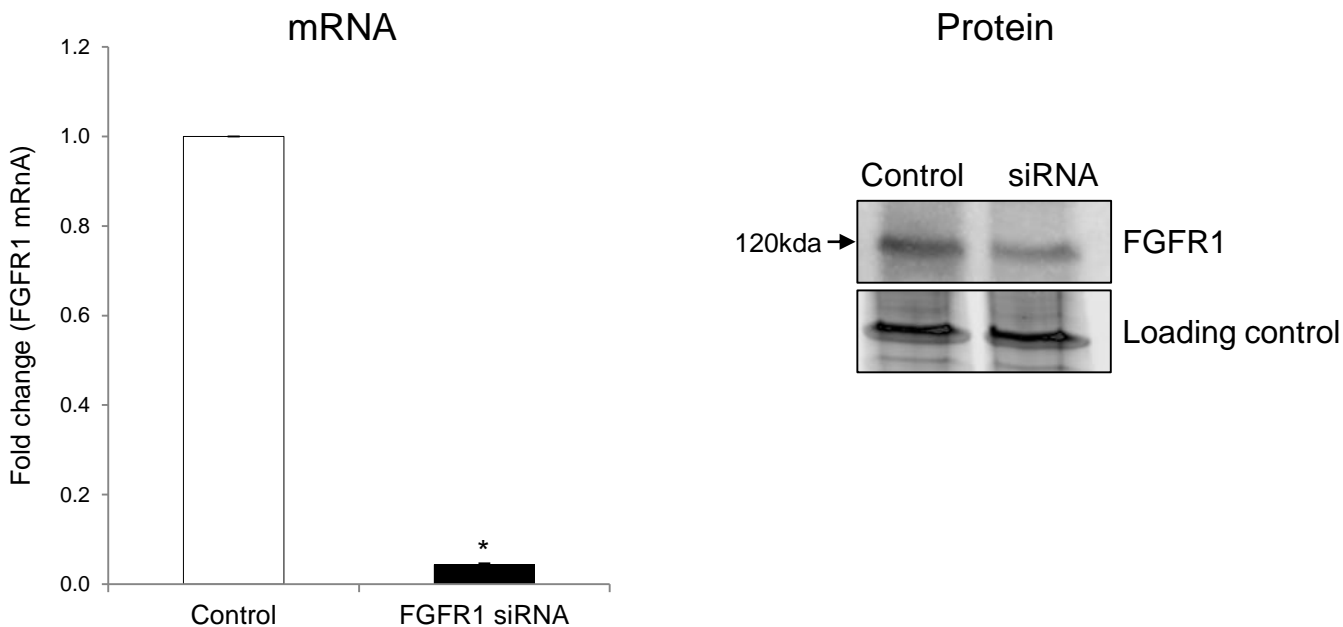

Supplementary Fig 1: Knockdown of FGFR1 using siRNA.

a: Knockdown of FGFR1 mRNA following FGFR1 siRNA with the Qiagen primers. \* indicates a significant difference from the Fc control, n=3. Representative images of immunocytochemistry for FGFR1 (green) following siRNA treatment, nuclei blue (DAPI). Scale bar represents 20µm. Representative Western blot of FGFR1 protein.

b: Knockdown of FGFR1 mRNA following FGFR1 siRNA with the Santa Cruz primers. \* indicates a significant difference from the Fc control, n=3. Representative Western blot of FGFR1 protein.
